# Supplementary material
Source: PubMed Central journal article supplement (PMC6858560)
Supplement: NIHMS1538530-supplement-Supplementary_Figure_1.pdf [file NIHMS1538530-supplement-Supplementary_Figure_1.pdf]

Fig. 3c

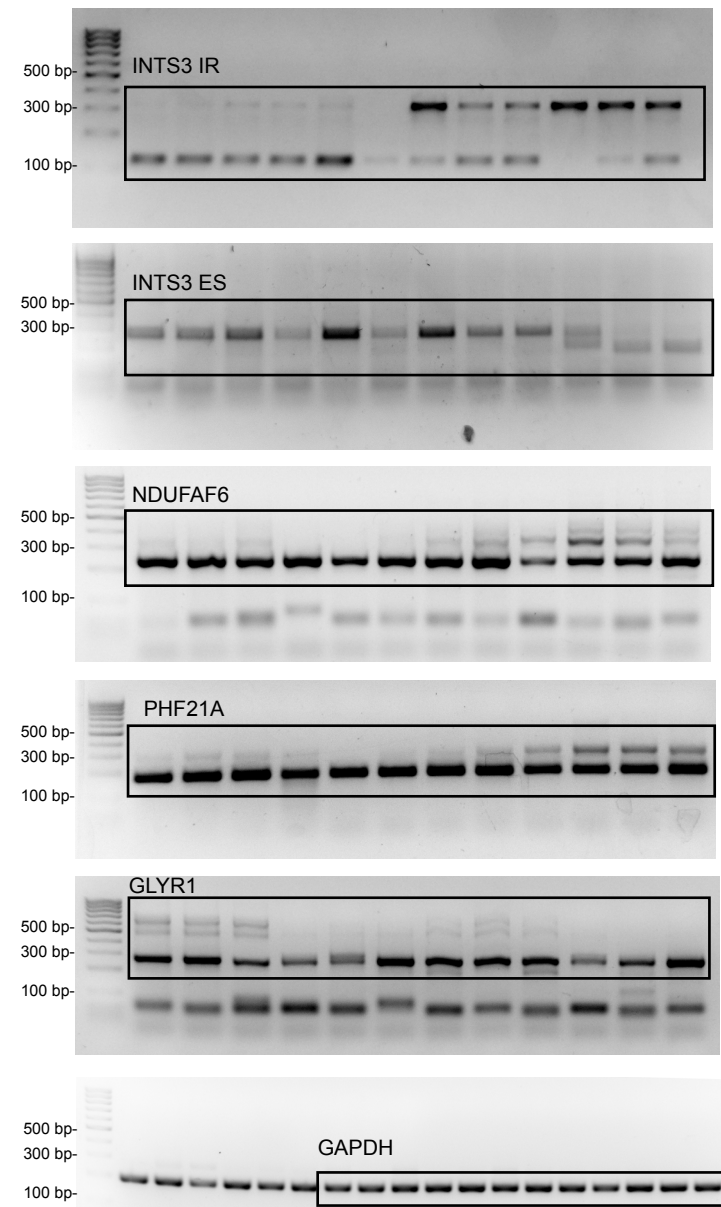

Loading controls (GAPDH) were run in a separate gel.

Fig. 3d

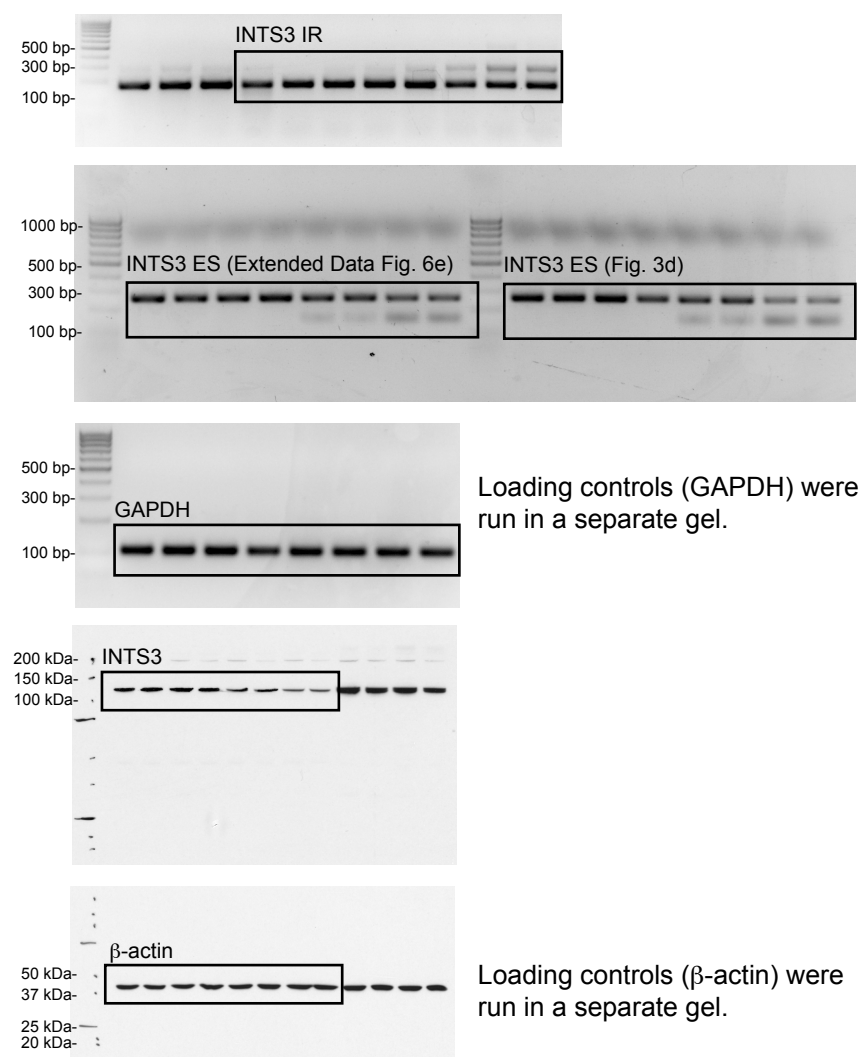

Loading controls (GAPDH) were run in a separate gel.

Loading controls ( $\beta$ -actin) were run in a separate gel.
